# Supplementary material for: MOF@Cell: 3D printed biobased filters anchored with a green metal–organic framework for effluent treatment
Source: Royal Society of Chemistry journal article supplement (doi:10.1039/d3ta01757e), 2023-01-01
Supplement: d3ta01757e1.pdf [file d3ta01757e1.pdf]

Supplementary information

# MOF@Cell: 3D printed biobased filters anchored with a green metal-organic framework for effluent treatment

*Natalia Fijol<sup>a,b</sup>, Andreas Mautner<sup>c,d</sup>, Erik Svensson Grape<sup>a</sup>, Zoltán Bacsik<sup>a</sup>, A.*

*Ken Inge<sup>a</sup> and Aji P, Mathew<sup>a,b\*</sup>*

<sup>a</sup> Department of Materials and Environmental Chemistry, Stockholm University, Frescativägen 8, 106 91, Stockholm, Sweden

<sup>b</sup> Wallenberg Wood Science Center, Teknikringen 56-58, 100 44, Stockholm, Sweden

<sup>c</sup> Polymer and Composite Engineering (PaCE) Group, Institute of Materials Chemistry and Research, Faculty of Chemistry, University of Vienna, Währinger Str, 42, 1090, Wien, Austria

<sup>d</sup> Institute for Environmental Biotechnology, Department IFA, University of Natural Resources and Life Sciences Vienna, Konrad-Lorenz-Straße 20, 3430 Tulln an der Donau, Austria

Correspondence to:

**\*Aji P, Mathew**

E-mail and phone: [aji.mathew@mmk.su.se](mailto:aji.mathew@mmk.su.se); +46 8161256

Department of Materials and Environmental Chemistry, Stockholm University, Frescativägen 8, 106 91, Stockholm, Sweden,

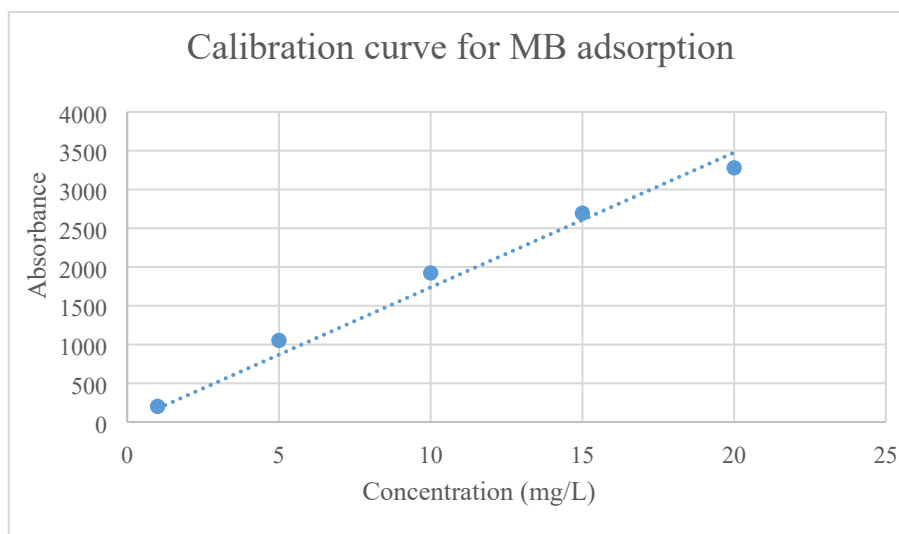

**Figure S1.** UV-Vis calibration curve for methylene blue (MB) adsorption.

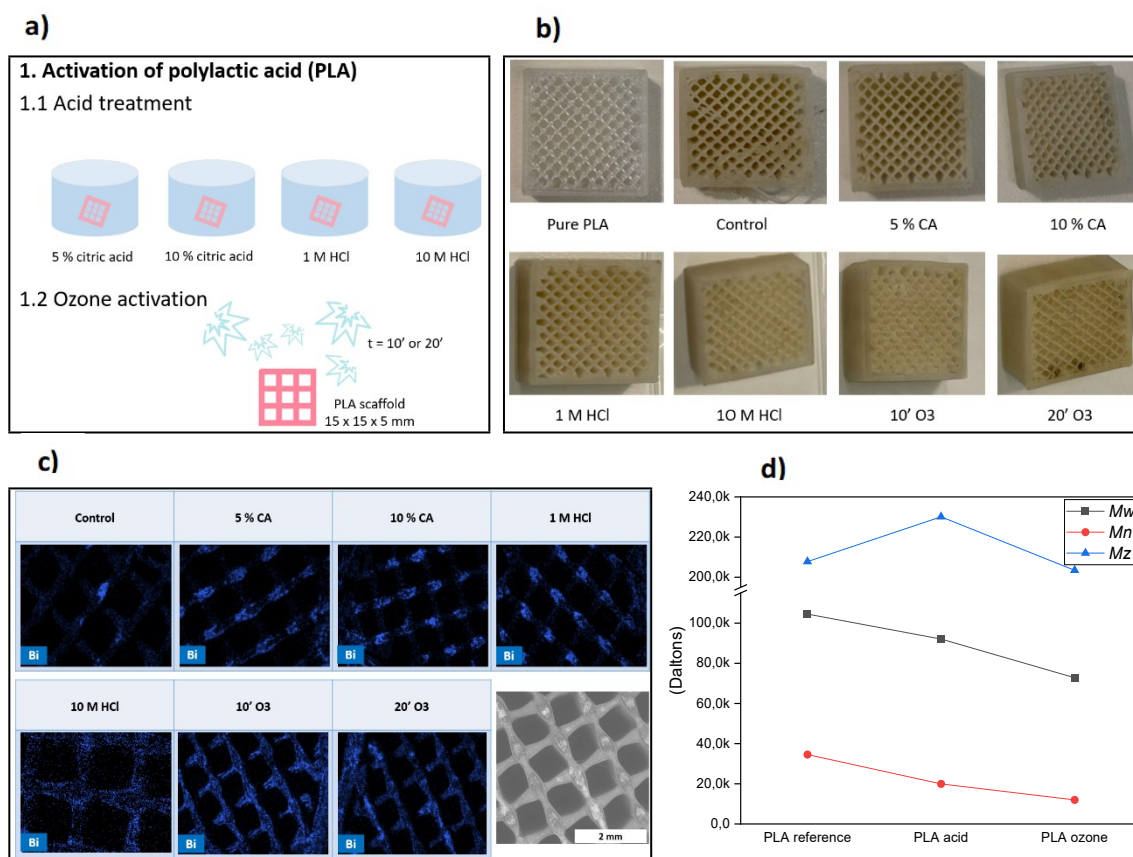

**Figure S2.** a) Overview of the optimization of the activation procedure; b) filters after activation and immersion in MOF suspension; c) SEM-EDX images with elemental mapping for (Bi) for the activated filters with anchored SU-101; d) changes of average molecular weights ( $M_w$ ,  $M_n$ ,  $M_z$ ) of acid (10 M HCl) and ozone (10') activated PLA filters.

| Sample | Weight of MOF per filter |
|--------|--------------------------|
|--------|--------------------------|

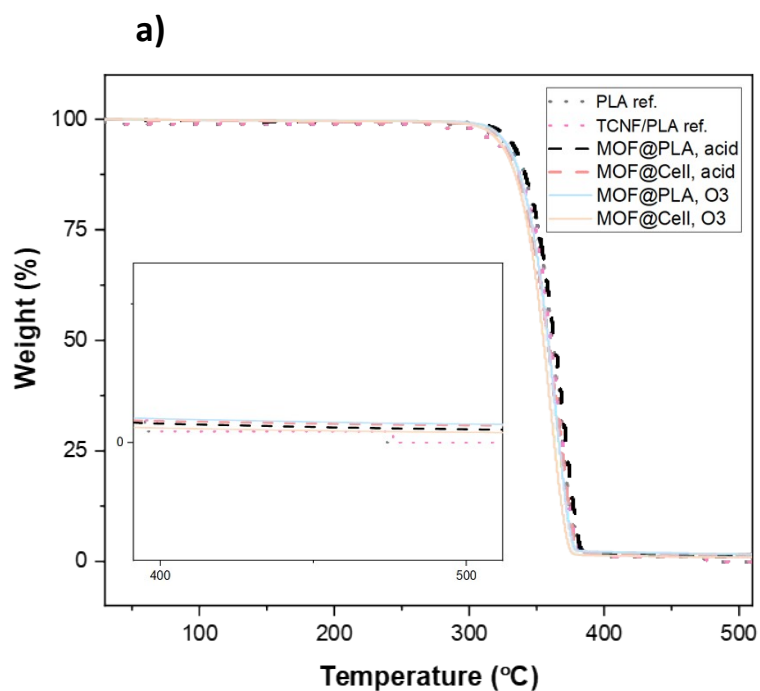

**b)**

|                 |         |
|-----------------|---------|
| MOF@PLA, acid   | 7.4 mg  |
| MOF@Cell, acid  | 14.2 mg |
| MOF@PLA, ozone  | 9.8 mg  |
| MOF@Cell, ozone | 8.3 mg  |

**Figure S3.** a) Thermographs obtained for the MOF@filters and corresponding matrix materials; b) weight (mg) of SU-101 per filter as calculated with the use of TGA data.

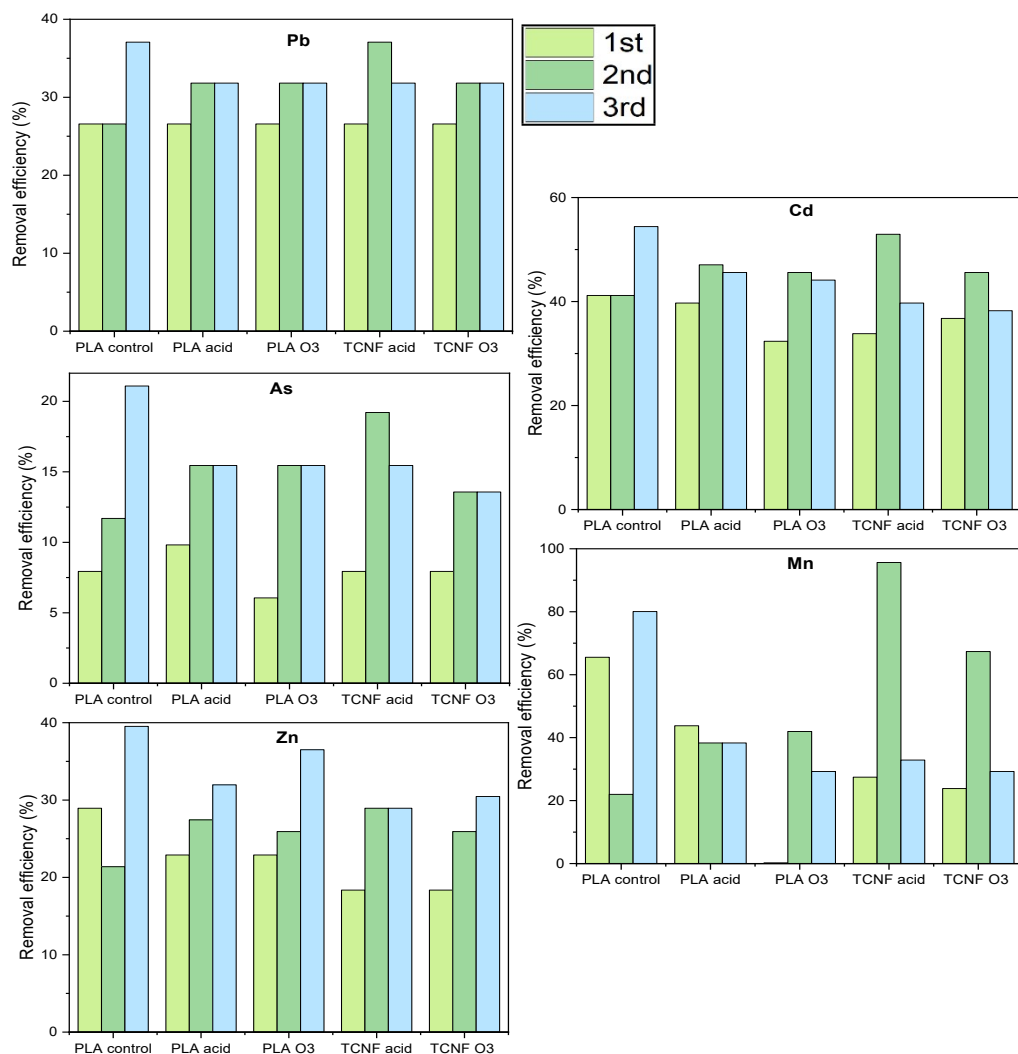

**Figure S4.** Adsorption efficiency for removal of various metal ions by MOF@filters after 1 h immersion in mine effluent as measured by ICP-

**Table S1.** Young's modulus and average toughness of all of the samples.

| Sample                   | Young's modulus (MPa) | Average toughness (J/cm <sup>3</sup> ) |
|--------------------------|-----------------------|----------------------------------------|
| PLA reference            | 1159.8 ± 102          | 4.8 ± 2                                |
| MOF@PLA, acid            | 1089.4 ± 57           | 2.1 ± 1                                |
| MOF@PLA, O <sub>3</sub>  | 1005.7 ± 228          | 5.0 ± 1                                |
| TCNF/PLA reference       | 1262.4 ± 128          | 8.7 ± 3.8                              |
| MOF@Cell, acid           | 1184.7 ± 89           | 6.9 ± 2.7                              |
| MOF@Cell, O <sub>3</sub> | 1172.7 ± 222          | 11.7 ± 0.8                             |

**Table S2.** Adsorption efficiencies (%) as measured by ICP-MS for all the tested filters within each adsorption cycle.

| Adsorption cycle and sample |                                 | Adsorption efficiency (%) |         |          |         |         |
|-----------------------------|---------------------------------|---------------------------|---------|----------|---------|---------|
|                             |                                 | Pb (II)                   | Mn (II) | As (III) | Cd (II) | Zn (II) |
| <i>i.</i>                   | PLA control, 1 h                | 26.6                      | 65.5    | 7.9      | 41.2    | 28.9    |
|                             | MOF@PLA acid, 1h                | 26.6                      | 43.8    | 9.8      | 39.7    | 22.9    |
|                             | MOF@PLA, O <sub>3</sub> , 1 h   | 26.6                      | 0.2     | 6.1      | 32.4    | 22.9    |
|                             | MOF@Cell, acid, 1 h             | 26.6                      | 27.4    | 7.9      | 33.8    | 18.4    |
|                             | MOF@Cell, O <sub>3</sub> , 1 h  | 26.6                      | 23.8    | 7.9      | 36.8    | 18.4    |
|                             | PLA control, 24 h               | 31.8                      | 69.2    | 9.8      | 51.5    | 22.9    |
|                             | MOF@PLA acid, 24 h              | 31.8                      | 56.5    | 13.6     | 50.0    | 35.0    |
|                             | MOF@PLA, O <sub>3</sub> , 24 h  | 31.8                      | 5.7     | 7.9      | 44.1    | 28.9    |
|                             | MOF@Cell, acid, 24 h            | 26.6                      | 34.7    | 9.8      | 44.1    | 28.9    |
|                             | MOF@Cell, O <sub>3</sub> , 24 h | 26.6                      | 27.4    | 7.9      | 42.6    | 21.4    |
| <i>ii.</i>                  | PLA control, 1 h                | 26.6                      | 22.0    | 11.7     | 41.2    | 21.4    |
|                             | MOF@PLA acid, 1h                | 31.8                      | 38.3    | 15.5     | 47.1    | 27.4    |
|                             | MOF@PLA, O <sub>3</sub> , 1 h   | 31.8                      | 42.0    | 15.5     | 45.6    | 25.9    |
|                             | MOF@Cell, acid, 1 h             | 37.1                      | 95.6    | 19.2     | 52.9    | 28.9    |
|                             | MOF@Cell, O <sub>3</sub> , 1 h  | 31.8                      | 67.3    | 13.6     | 45.6    | 25.9    |
|                             | PLA control, 24 h               | 37.1                      | 29.3    | 15.5     | 47.1    | 35.0    |
|                             | MOF@PLA acid, 24 h              | 31.8                      | 52.8    | 15.5     | 52.9    | 39.5    |
|                             | MOF@PLA, O <sub>3</sub> , 24 h  | 37.1                      | 51.0    | 17.3     | 55.9    | 42.6    |
|                             | MOF@Cell, acid, 24 h            | 37.1                      | 60.1    | 21.1     | 57.4    | 39.5    |
|                             | MOF@Cell, O <sub>3</sub> , 24 h | 42.3                      | 72.8    | 21.1     | 47.1    | 41.0    |
|                             | PLA control, 1 h                | 37.1                      | 80.0    | 21.1     | 54.4    | 39.5    |
|                             | MOF@PLA acid, 1h                | 31.8                      | 38.3    | 15.5     | 45.6    | 32.0    |

|             |                                 |      |      |      |      |      |
|-------------|---------------------------------|------|------|------|------|------|
| <i>iii.</i> | MOF@PLA, O <sub>3</sub> , 1 h   | 31.8 | 29.3 | 15.5 | 44.1 | 36.5 |
|             | MOF@Cell, acid, 1 h             | 31.8 | 32.9 | 15.5 | 39.7 | 28.9 |
|             | MOF@Cell, O <sub>3</sub> , 1 h  | 31.8 | 29.3 | 13.6 | 38.2 | 30.5 |
|             | PLA control, 24 h               | 61.2 | 85.7 | 26.7 | 67.6 | 56.2 |
|             | MOF@PLA acid, 24 h              | 42.3 | 49.2 | 19.2 | 57.4 | 45.6 |
|             | MOF@PLA, O <sub>3</sub> , 24 h  | 42.3 | 45.6 | 17.3 | 58.8 | 12.3 |
|             | MOF@Cell, acid, 24 h            | 37.1 | 58.3 | 17.3 | 52.9 | 36.5 |
|             | MOF@Cell, O <sub>3</sub> , 24 h | 37.1 | 38.3 | 17.3 | 55.9 | 44.1 |
